# Supplementary material
Source: MDPI journal article supplement (https://www.mdpi.com/2071-1050/12/8/3256)

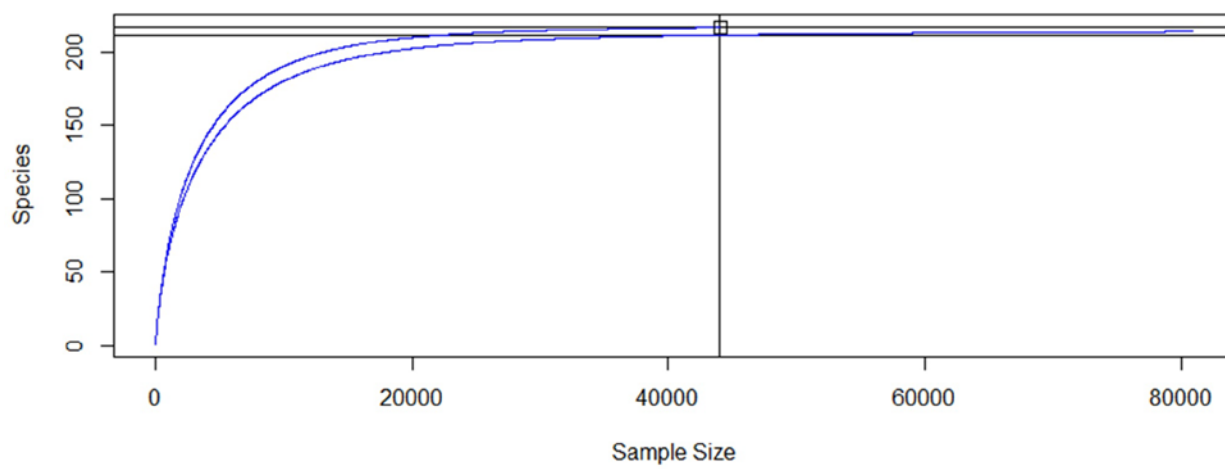

**Figure S1**

Supplement: s1 [file s1]
